# Supplementary material for: Plasma-Engineered N-CoOx Nanowire Array as a Bifunctional Electrode for Supercapacitor and Electrocatalysis
Source: MDPI journal article supplement (doi:10.3390/nano12172984), 2022-08-29
Supplement: s1 [file s1]

# Supplementary Materials

## Plasma-engineered N-CoO<sub>x</sub> nanowire array as bifunctional electrode for supercapacitor and electrocatalysis

Qi Wang, TongTong Zhong and Zhou Wang \*

Key Laboratory of Liquid-Solid Structural Evolution and Processing of Materials of Ministry of Education, School of Materials Science and Engineering, Shandong University, Jinan 250061, China

\* Correspondence: wangzhou@sdu.edu.cn

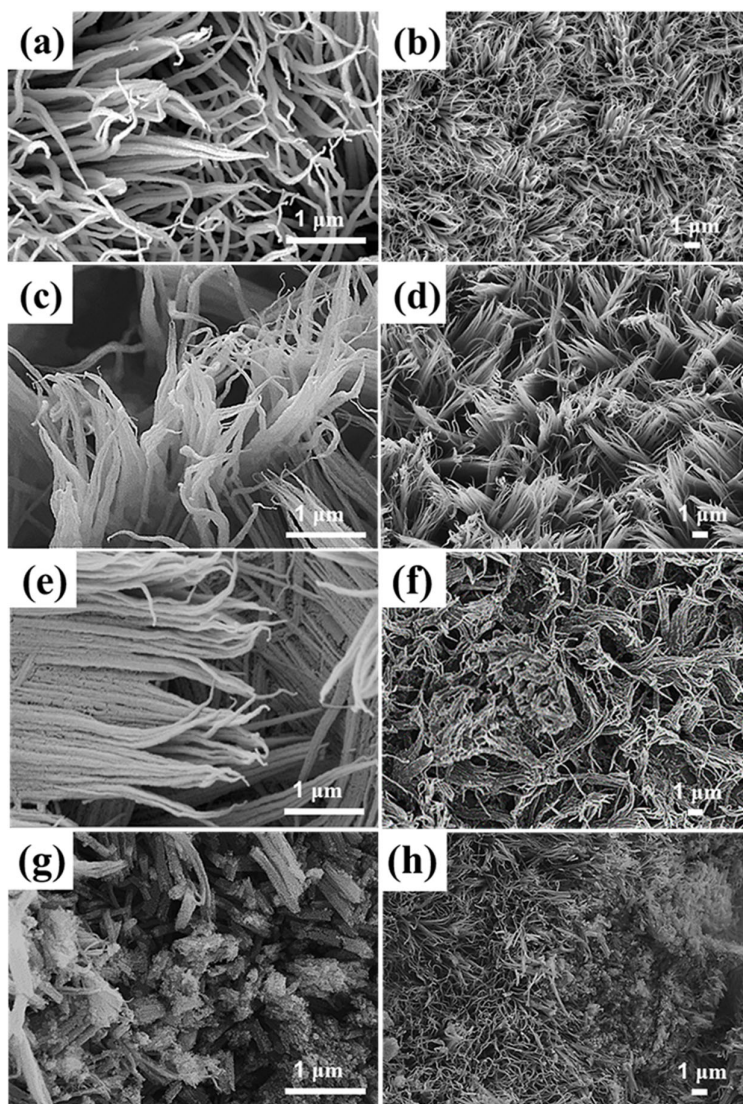

Figure S1. SEM images of N/Ar-t: (a,b) t = 2, (c,d) t = 4, (e,f) t = 8, (g,h) t = 10.

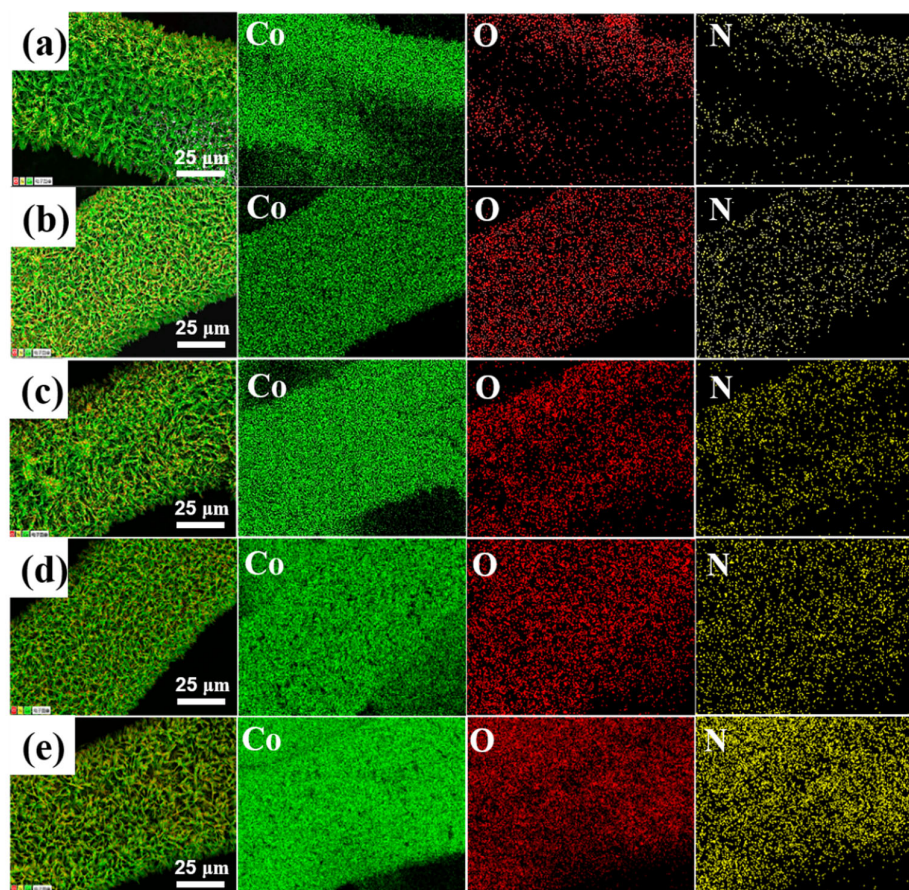

Figure S2. EDS mapping of N/Ar-t: (a)  $t = 2$ , (b)  $t = 4$ , (c)  $t = 6$ , (d)  $t = 8$ , (e)  $t = 10$ .

Table S1. Element concentration in N/Ar-t ( $t = 2, 4, 6, 8, 10$  min)

| Sample  | Co (wt%) | Co (at%) | O (wt%) | O (at%) | N (wt%) | N (at%) |
|---------|----------|----------|---------|---------|---------|---------|
| N/Ar-2  | 99.4     | 97.7     | 0.6     | 0.3     | 0       | 0       |
| N/Ar-4  | 98       | 92.9     | 1.7     | 6.0     | 0.3     | 1.1     |
| N/Ar-6  | 98.5     | 94.8     | 1.1     | 3.9     | 0.3     | 1.3     |
| N/Ar-8  | 98.8     | 95.1     | 0.9     | 3.2     | 0.4     | 1.7     |
| N/Ar-10 | 97.8     | 92.4     | 1.6     | 5.6     | 0.5     | 2       |

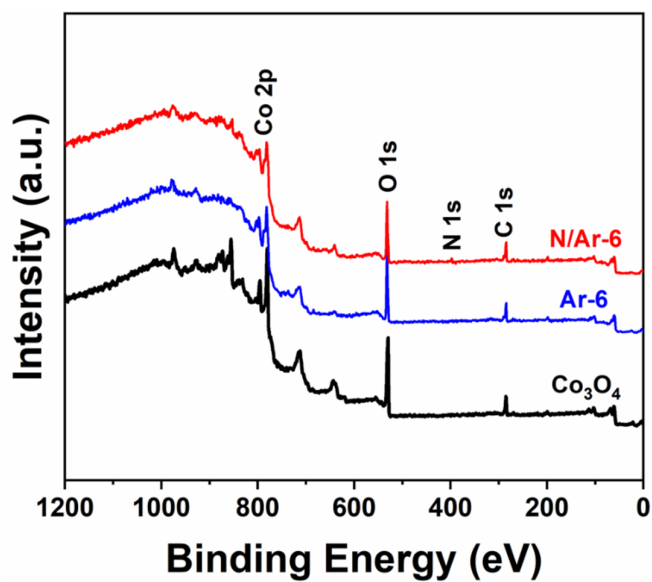

Figure S3. XPS survey spectra of  $\text{Co}_3\text{O}_4$ , Ar-6 and N/Ar-6.

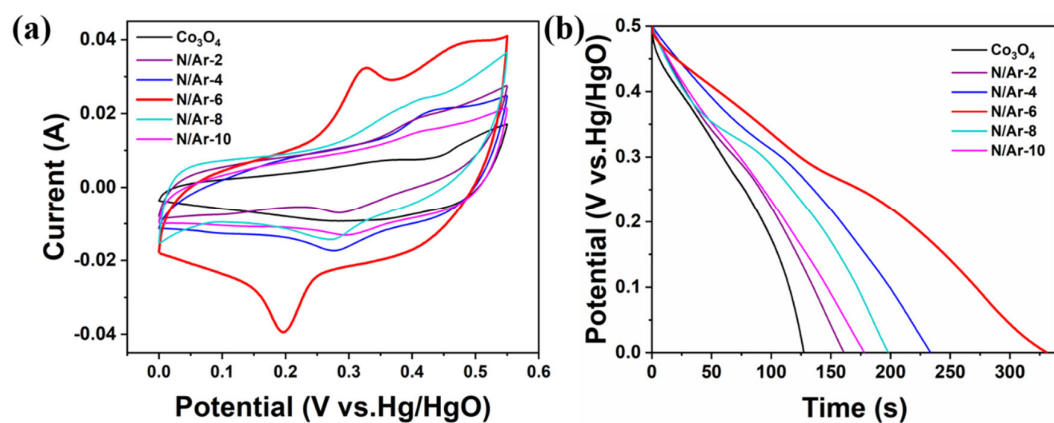

Figure S4. (a) CV and (b) GCD curves of pristine  $\text{Co}_3\text{O}_4$  and N/Ar- $t$  ( $t = 2, 4, 6, 8, 10$  min).

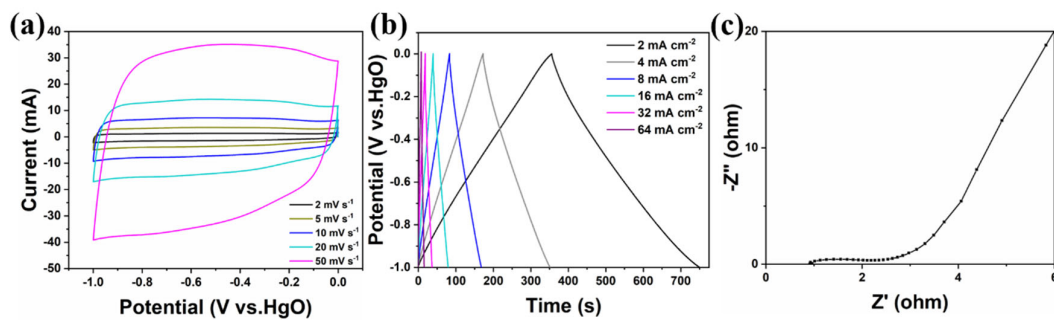

Figure S5. (a) CV, (b) GCD and (c) Nyquist curves of AC-40 half cell.



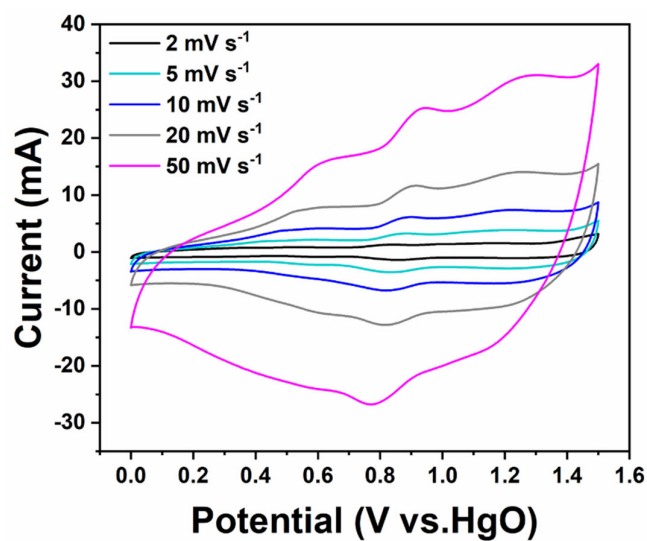

Figure S6. CV curves of N/Ar-6//AC-40 asymmetric device.

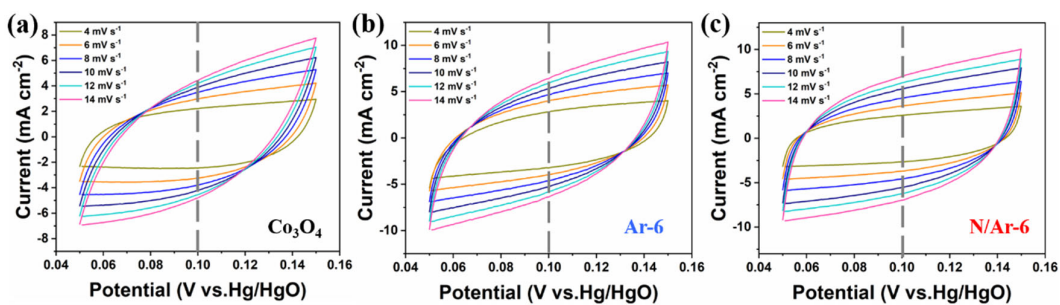

Figure S7. CV curves of  $\text{Co}_3\text{O}_4$ , Ar-6 and N/Ar-6 for EASA measurement.
